# Supplementary material for: MiR-34a suppresses amphiregulin and tumor metastatic potential of head and neck squamous cell carcinoma (HNSCC)
Source: PubMed Central journal article supplement (PMC4480692; doi:10.18632/oncotarget.3148), 2015-02-05
Supplement: oncotarget-06-7454-s001.pdf [file oncotarget-06-7454-s001.pdf]

**SUPPLEMENTARY FIGURES**

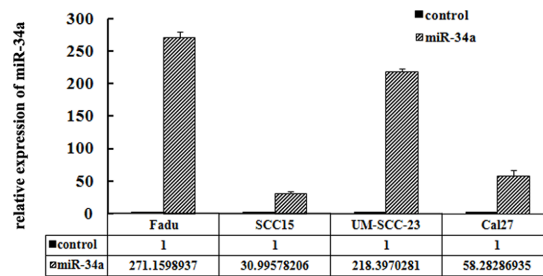

Supplementary Figure 1: The relative miR-34a levels in miR-34a over-expression cells and the control cells.

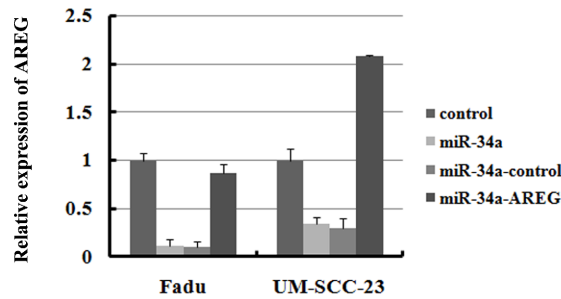

Supplementary Figure 2: The relative AREG mRNA levels in stable clones of Fadu-miR-34a-AREG and UM-SCC-23-miR-34a-AREG cells.

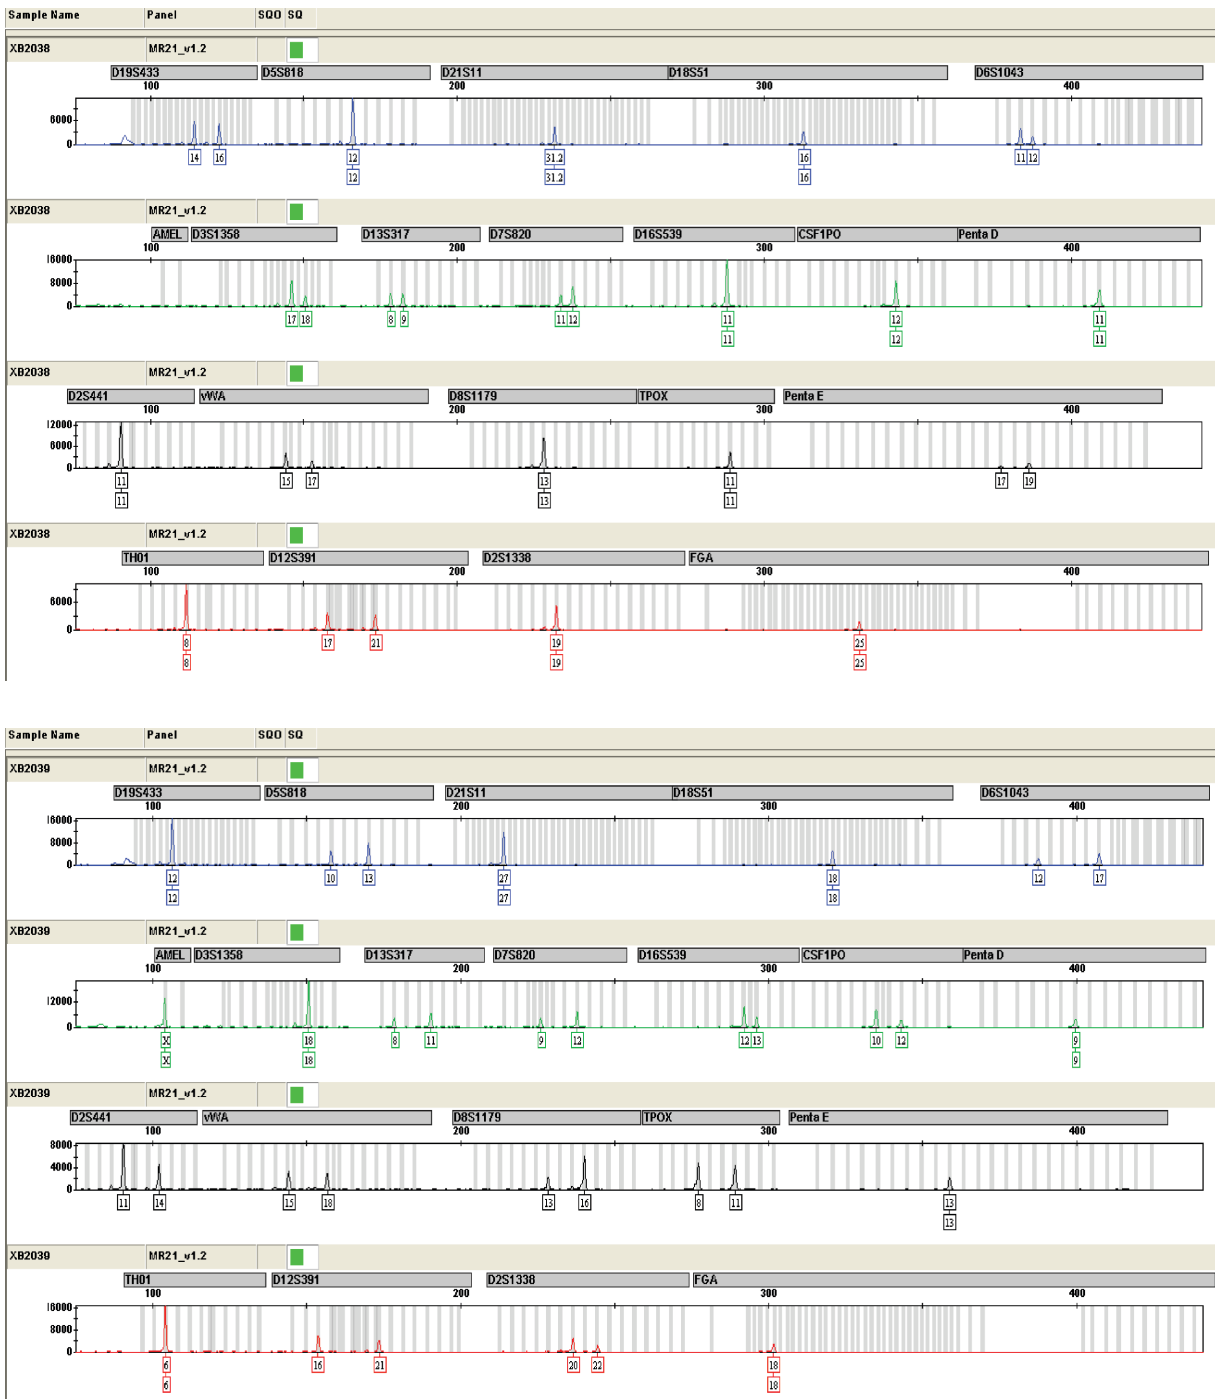

Supplementary Figure 3: The report of Fadu, UM-SCC-23, and Cal27 Cell Lines authentication. (Continued)

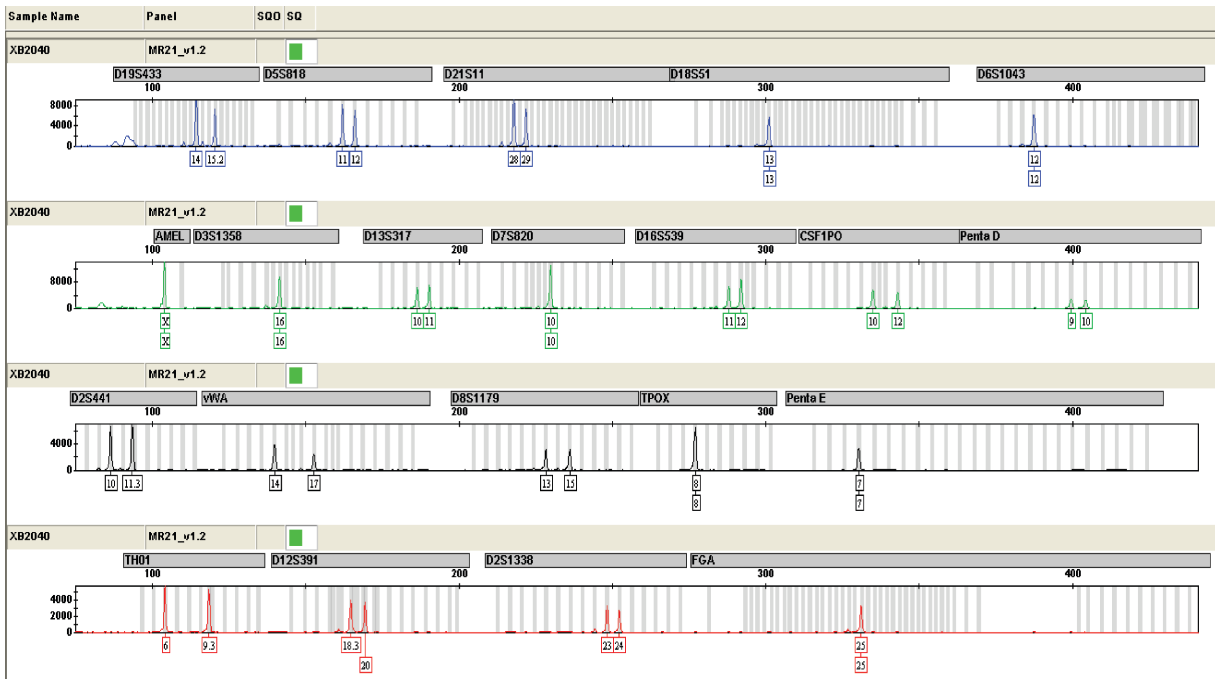

Supplementary Figure 3: (Continued) The report of Fadu, UM-SCC-23, and Cal27 Cell Lines authentication.
